# Supplementary material
Source: publisher site journal article supplement (https://www.dovepress.com/article/358733)
Supplement: Supplementary file 1 [file get_supplementary_file.php]

**APPENDIX**. Variable Identification & Description

| **Type** | **Variable** | **Description** | **Variable Inclusion Rationale** | **Primary Data Sources & Prior Author / Study Utilization** |
| --- | --- | --- | --- | --- |
|  | All Cause Hospital-Wide Readmission Rate | The proportion of patients that were readmitted within 30 days to a hospital for any reason compared to the total number of patients that were discharged. | Study dependent variable | Hospital Compare; Benbassat & Taragin, 2000; Chee, Ryan, Wasfy, & Borden, 2016; Das, et. al, 2016; Krumholz, et. al, 2017 |
| Hip/Knee Replacement Readmission Rate | The proportion of patients that were readmitted to a hospital within 30 days for hip / knee replacement compared to the total number of patients that were discharged. | Study dependent variable | Hospital Compare; Saucedo, Marecek, Wanke, Lee, Stulberg & Puri, 2014; Roger, et al., 2019; Schairer, Vail, & Bozic, 2014 |
| Chronic Obstructive Pulmonary Disease (COPD) Readmission Rate | The proportion of patients that were readmitted to a hospital within 30 days for COPD compared to the total number of patients that were discharged. | Study dependent variable | Hospital Compare; Alshabanat, et al., 2017. |
| Heart Attack Readmission Rate | The proportion of patients that were readmitted to a hospital within 30 days for heart attack compared to the total number of patients that were discharged. | Study dependent variable | Hospital Compare; Desai, et al., 2016; Ibrahim, et al., 2018;  Wadhera, et al., 2018; Wasfy, et al., 2017. |
|  | Heart Failure Readmission Rate | The proportion of patients that were readmitted to a hospital within 30 days for heart failure compared to the total number of patients that were discharged. | Study dependent variable | Hospital Compare; Desai, et al., 2016; Ibrahim, et al., 2018; Wadhera, et al., 2018; Gupta, et al., 2018;  Wasfy, et al., 2017. |
| Pneumonia Readmission Rate | The proportion of patients that were readmitted to a hospital within 30 days for pneumonia compared to the total number of patients that were discharged from the hospital. | Study dependent variable | Hospital Compare; Desai, et al., 2016; Ibrahim, et al., 2018; Wadhera, et al., 2018; Wasfy, et al., 2017. |
| *Control*  *Variables* | For- Profit Ownership Status | For-profit vs not-for-profit hospital ownership and operation | Some studies have shown for-profit hospitals are associated with higher readmission rates. However, for profit hospitals may have greater access to resources to positively influence patient safety, but may have more incentive to ‘cut corners’ to meet profitability targets. | Medicare Cost Report; Borah, et. al, 2012; Das, et. al, 2016; DesHarnais, McMahon, Wroblewski, & Hogan, 1990; Lasater, Germack, Small, & McHugh, 2016; Sloan, Picone, Taylor, & Chou, 2001; Mittal, Wang, Goben & Boyd, 2018; Birmingham & Oglesby, 2018. |
| Staffed Bed Size | The number of beds that are licensed and physically available for which staff is on hand to attend the patient who occupies the bed (Emergency support Function & Health and Medical Response) | The number of staffed beds is included as a proxy variable to assess the size of the hospital | Medicare Cost Report; Chee, Ryan, Wasfy, & Borden, 2016; Das, et. al, 2016; Haas, Gomez, Hemmila, & Nathens, 2011; Ryan, Krinsky, Maurer, & Dimick, 2017; Shojania & Forster, 2008 |
| Teaching Status | A hospital is considered a teaching hospital if it has one or more ACGME (Accreditation Council for Graduate Medical Education) approved residency programs (Health care Cost and Utilization Project) | Teaching hospitals bring together medical education, research, and patient care in a unique environment where the next generation of doctors, nurses, and other health professionals are trained. They foster an environment of discovery and the latest advances in medicine. In many areas, teaching hospitals serve underserved and distressed socioeconomic groups as their primary patient population. | Medicare Cost Report; Ayanian & Weissman, 2002**;** Chirikos & Sear, 2000; Das, et. al, 2016; DesHarnais, McMahon, Wroblewski, & Hogan, 1990; Lasater, Germack, Small, & McHugh, 2016; Ryan, Krinsky, Maurer, & Dimick, 2017 |
| CMI (Case Mix Index) | The average relative DRG weight of a hospital’s inpatient discharges, calculated by summing the Medicare Severity Diagnosis Related Group (MS-DRG) weight for each discharge and dividing the total by the number of discharges | The case mix index is included as a variable to provide insight into the association that case complexity has with hospital readmissions. Hospitals with higher case mix indexes will logically have higher readmission rates given the levels of complexity of the cases they treat. | Medicare Cost Report; Aboelela, Stone, & Larson, 2007; Lasater, Germack, Small, & McHugh, 2016 |
| Average Length of Stay | The average amount of time, in days, that a patient remains in the hospital before they are discharged | Length of stay has been shown to be associated with readmission rates in prior research. | Medicare Cost Report; Aboelela, Stone, & Larson, 2007; Chirikos & Sear, 2000; Hofmarcher, Paterson, & Riedel, 2002; Williams, et al., 2017; Reynolds, et al., 2015; Rachoin, Aplin, Gandhi, Kupersmith & Cerceo, 2020 |
| Outpatient Service Mix | The average relative weight of the procedures billed for outpatient service | Availability of outpatient services has been shown to be associated with readmission reduction for some specialties. Those organizations with a high level of outpatient services may have more robust service offerings available to help limit readmissions. | Medicare Cost Report; Chirikos & Sear, 2000; Cheng, Chan, Gula & Parker, 2017; Budlong, Brummel Rhodes & Nici, 2018 |
| Urban or Rural | Location of the hospital based on the United States Census Bureau's classification system. Urban / urbanized areas are identified as locations > 2,500 people. | Rural hospitals, on average, serve an older patient population and have been shown to have a utilization rate (as measured by Medicare discharges per hospital), about one-third that for urban hospitals and an average length of stay two days shorter per Medicare discharge. | US Census Bureau; Das, et. al, 2016; Lasater, Germack, Small, & McHugh, 2016 |
| Government Operated | Whether the hospital is operated by a government entity or not | A dichotomous variable representing whether the hospital was owned/operated by a government entity (or not) was included in the study given their differences in patient populations served, financing sources, and governance. | Medicare Cost Report; Das, et. al, 2016; DesHarnais, McMahon, Wroblewski, & Hogan, 1990; Chirikos & Sear, 2000 |
| Number of Discharges | The amount of individuals that are determined to be healthy enough to be discharged from the care of the hospital. | The volume of hospital discharges has been shown in prior literature to be associated with readmission rates. | Medicare Cost Report; Ayanian & Weissman, 2002**;** Hofmarcher, Paterson, & Riedel, 2002; Horwitz, et al., 2015. |
| System Member | Whether the hospital is part of a hospital system | Prior studies have shown that hospitals that are affiliated with integrated systems are more capable of reducing hospital readmissions. System members may be more adept at sharing resources and leading practice methods to positively influence readmission rates. | Medicare Cost Report; Gray, 1986**;** Silow-Carroll, Edwards & Lashbrook (2011) |
| Hospital Compare Rating | A consumer-oriented website that provides information on how well hospitals provide recommended care to their patients  (CMS.gov) | Hospital Compare scores are partially based on hospital readmission rates. In addition, we included consumer perceptions of quality of care in our study as patients and payers may alter their choices regarding hospital care venue based on publicly facing quality information. This may have an associated effect on readmission rates. | Hospital Compare: Goldman & Dudley, 2008; Halasyamani & Davis, 2007; Silber, Rosenbaum, Brachet, Ross, Bressler, et. al, 2010; Werner & Bradlow, 2006 |
| Market Concentration Index | The Herfindahl–Hirschman Index is a commonly accepted measure of market concentration. The HHI is calculated by squaring the market share of each firm competing in the market and then summing the resulting numbers. | The market concentration index has been shown to be associated with readmission rates in some studies. | Medicare Cost Report; Lasater, Germack, Small, & McHugh, 2016; Ho & Hamilton, 2000; Short & Ho, 2020 |
| Occupancy Rate | The proportion of a hospital’s inpatient capacity being utilized for inpatient care  (Health care Financial Management) | The hospital occupancy rate has been shown to be associated with readmission rates in some studies. | Medicare Cost Report; Chirikos & Sear, 2000; Das, et. al, 2016; Friebel, et al., 2019 |
| Region | The area in the part of the country they are located as defined by the American Hospital Association. | Prior studies have shown significant variation in readmission rates by US region. Readmission rates have been shown to be affected by differences in demographic characteristics and disease profiles among beneficiaries in different areas of the country. | American Hospital Association; Borah, et. al, 2012; Das, et. al, 2016; DesHarnais, McMahon, Wroblewski, & Hogan, 1990; Gray, 1986; Robert Wood Johnson Foundation, 2013; Daras, Ingber, Deutsch, Hefele, Perloff, 2018 |
